# Supplementary material for: The dual specificity phosphatase 2 gene is hypermethylated in human cancer and regulated by epigenetic mechanisms
Source: PubMed Central journal article supplement (PMC4736155; doi:10.1186/s12885-016-2087-6), 2016-02-01
Supplement: 12885_2016_2087_MOESM3_ESM.pdf [file 12885_2016_2087_MOESM3_ESM.pdf]

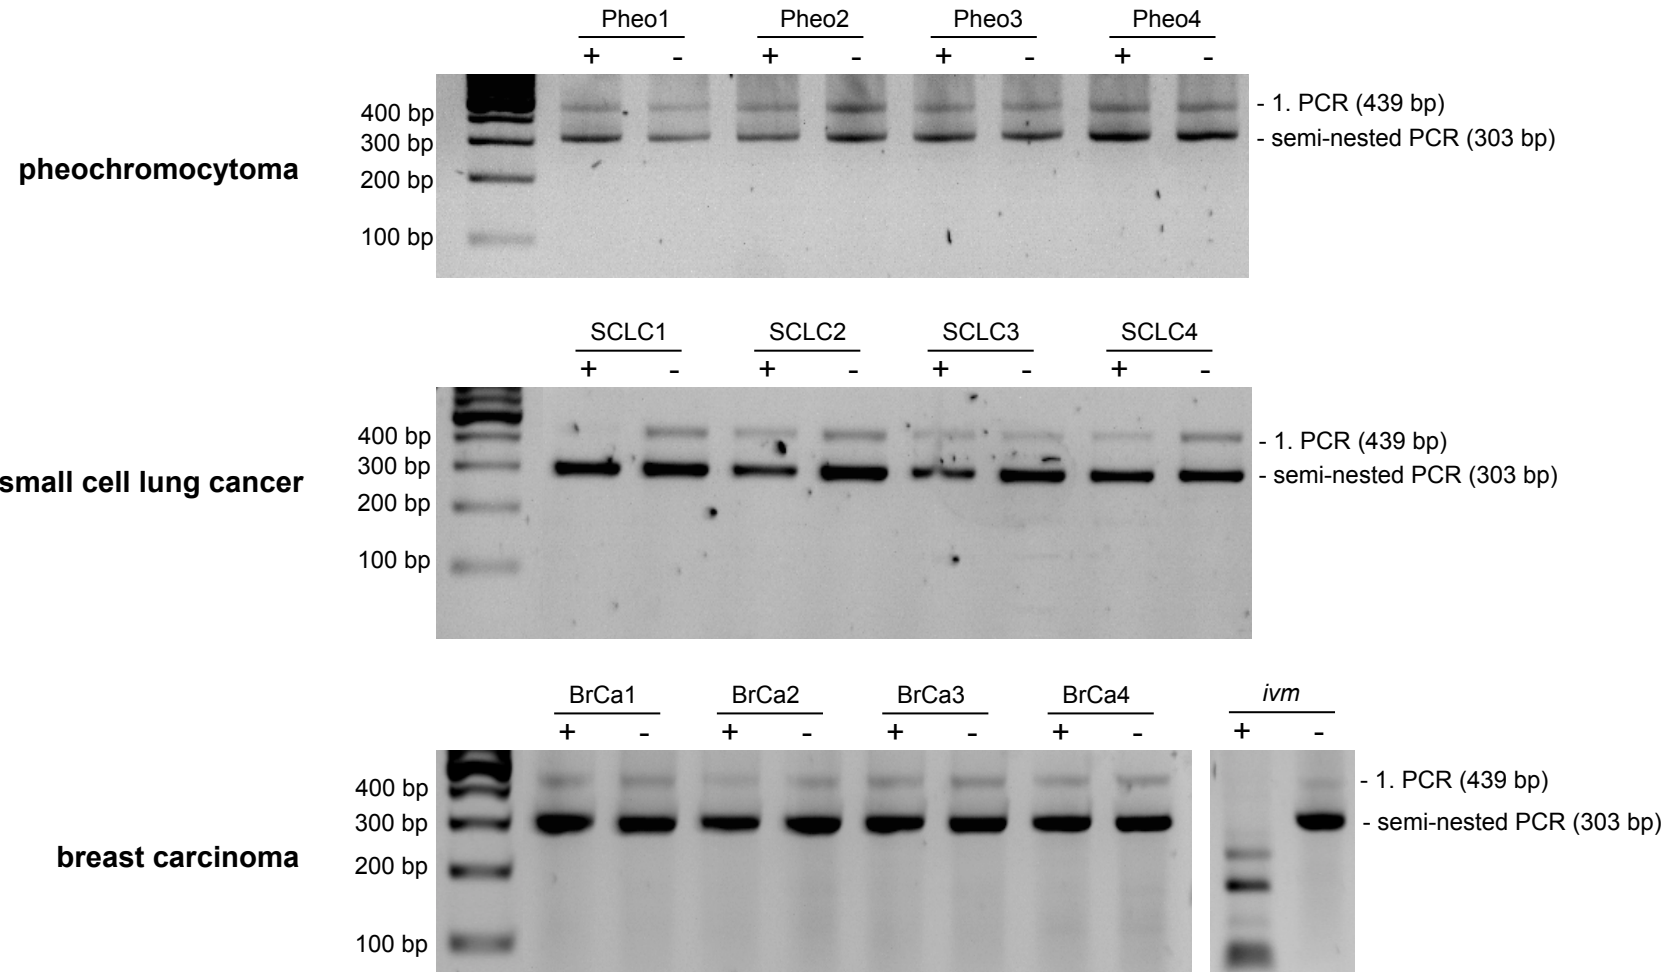

**Supplement Figure S1. Four examples of methylation analysis of *DUSP2* in primary pheochromocytomas (Pheo), small cell lung cancer (SCLC) and breast cancer (BrCa).** For COBRA bisulfite-treated DNA from four primary cancers and *in vitro* methylated HeLa DNA (*ivm*) was amplified by semi-nested PCR. First and second PCR products are indicated (439 bp and 303 bp, respectively). Products were digested with *TaqI* (+) or mock digested (-) and resolved on 2% agarose gels with a 100 bp marker (M).
