# Supplementary material for: The dual specificity phosphatase 2 gene is hypermethylated in human cancer and regulated by epigenetic mechanisms
Source: PubMed Central journal article supplement (PMC4736155; doi:10.1186/s12885-016-2087-6), 2016-02-01
Supplement: 12885_2016_2087_MOESM4_ESM.pdf [file 12885_2016_2087_MOESM4_ESM.pdf]

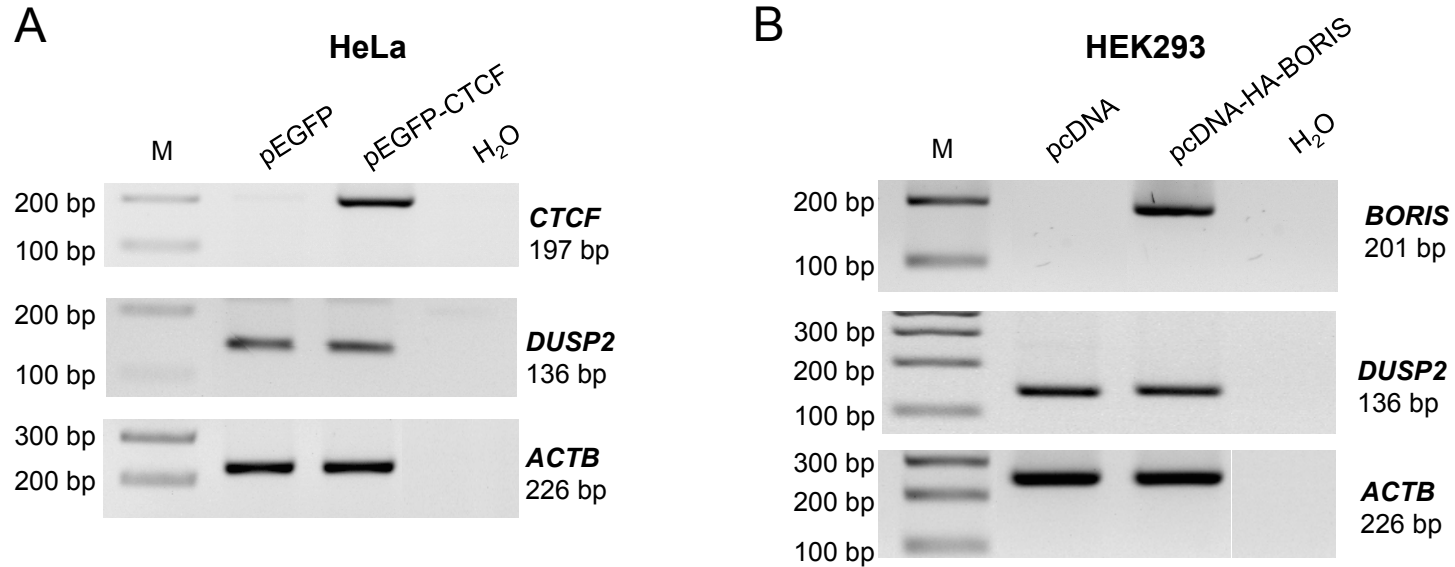

**Supplement Figure S2. CTCF- and BORIS-dependent expression of *DUSP2* in HeLa and HEK293 cells, respectively.** **A.** CTCF and vector control (pEGFP) were transfected in HeLa. After two days *CTCF*, *DUSP2* and *ACTB* expression was analyzed by RT-PCR and separated on a 2% gel together with a 100 bp ladder marker (M) **B.** Expression of *DUSP2* after transfection of BORIS and vector control in HEK293 cells (for details see A).
